# Supplementary material
Source: PubMed Central journal article supplement (PMC8176655)
Supplement: NIHMS1699763-supplement-Supplemental_Figure_1.pdf [file NIHMS1699763-supplement-Supplemental_Figure_1.pdf]

# Supplementary Figure 1

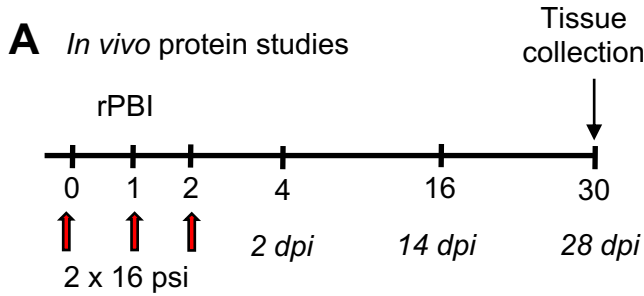

**B**

| Time point (dpi) | n (mice) | Measured endpoints                                 |
|------------------|----------|----------------------------------------------------|
| 2, 14, 28        | 4        | Retinal RIPK1 and RIPK3 immunofluorescent staining |

**C** *In vivo* Nec-1s study

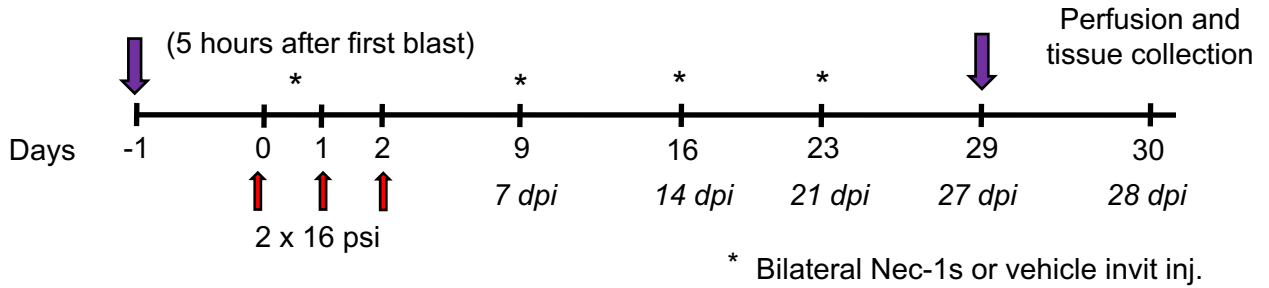

**D** Experimental groups, group sizes

| Groups          | n (mice) | Injury and treatment                                |
|-----------------|----------|-----------------------------------------------------|
| Blast blocked   | 10       | Blast overpressure wave blocked                     |
| rPBI + no invit | 10       | 3 x 2 x 16 psi + no invit injections                |
| rPBI + vehicle  | 10       | 3 x 2 x 16 psi + bilateral vehicle invit injections |
| rPBI + Nec-1s   | 10       | 3 x 2 x 16 psi + bilateral Nec-1s invit injections  |

**E** Measured endpoints and eyes analysed

| Measured endpoints                                    | Eyes analysed         |
|-------------------------------------------------------|-----------------------|
| OCT imaging                                           | Both eyes             |
| Total retinal and GCC thickness                       | Left direct blast eye |
| Intensity of vitreous haze on OCT images              | Both eyes             |
| RBPMs <sup>+</sup> RGC counts on retinal cryosections | Left direct blast eye |
| ED1 and GFAP IF staining on retinal and ON sections   | Left direct blast eye |
| Axonal counts in ON                                   | Left direct blast eye |
