# Supplementary material
Source: PubMed Central journal article supplement (PMC8176655)

**A** Blast-wave pressure and wave form

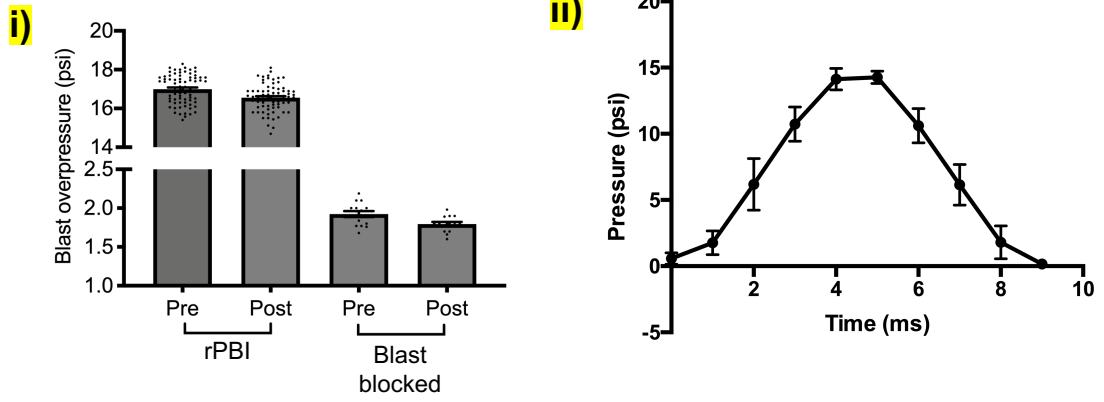

**B** Analysis of vitreal haze on OCT images

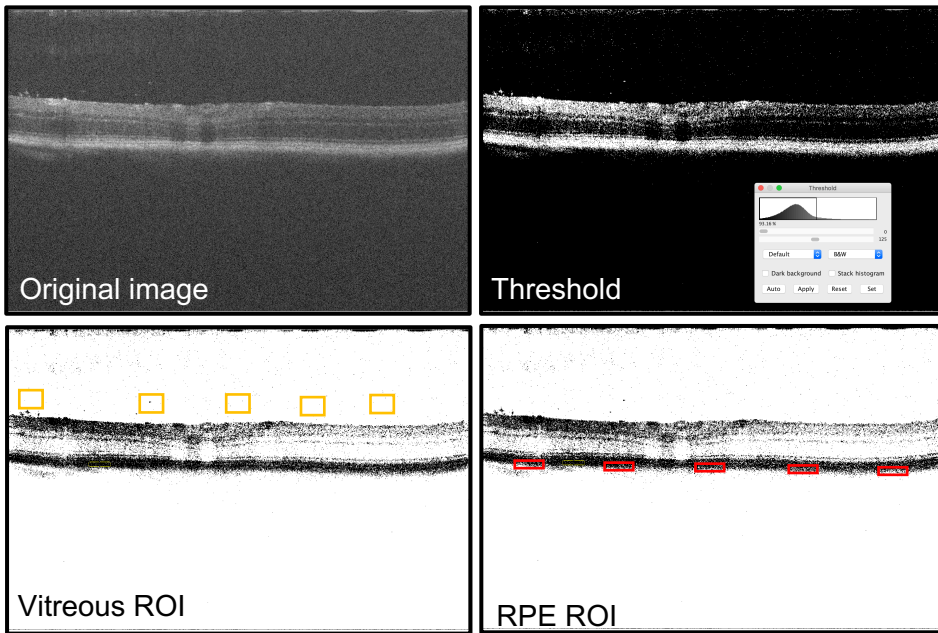

**C** Quantification of RGC on retinal cryosections

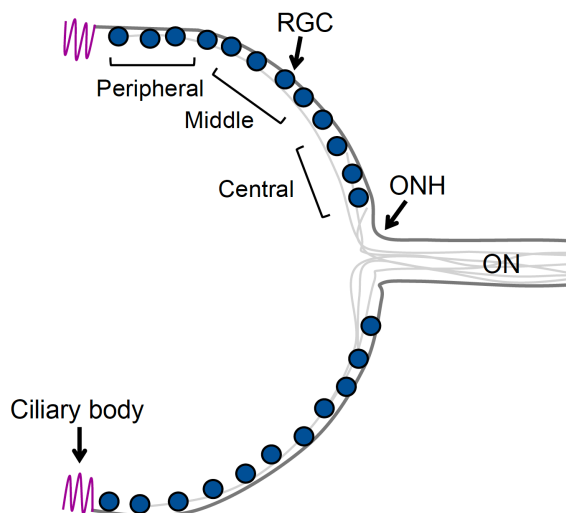

Supplement: NIHMS1699763-supplement-Supplemental_Figure_2.pdf [file NIHMS1699763-supplement-Supplemental_Figure_2.pdf]
