# Supplementary material
Source: PubMed Central journal article supplement (PMC8176655)

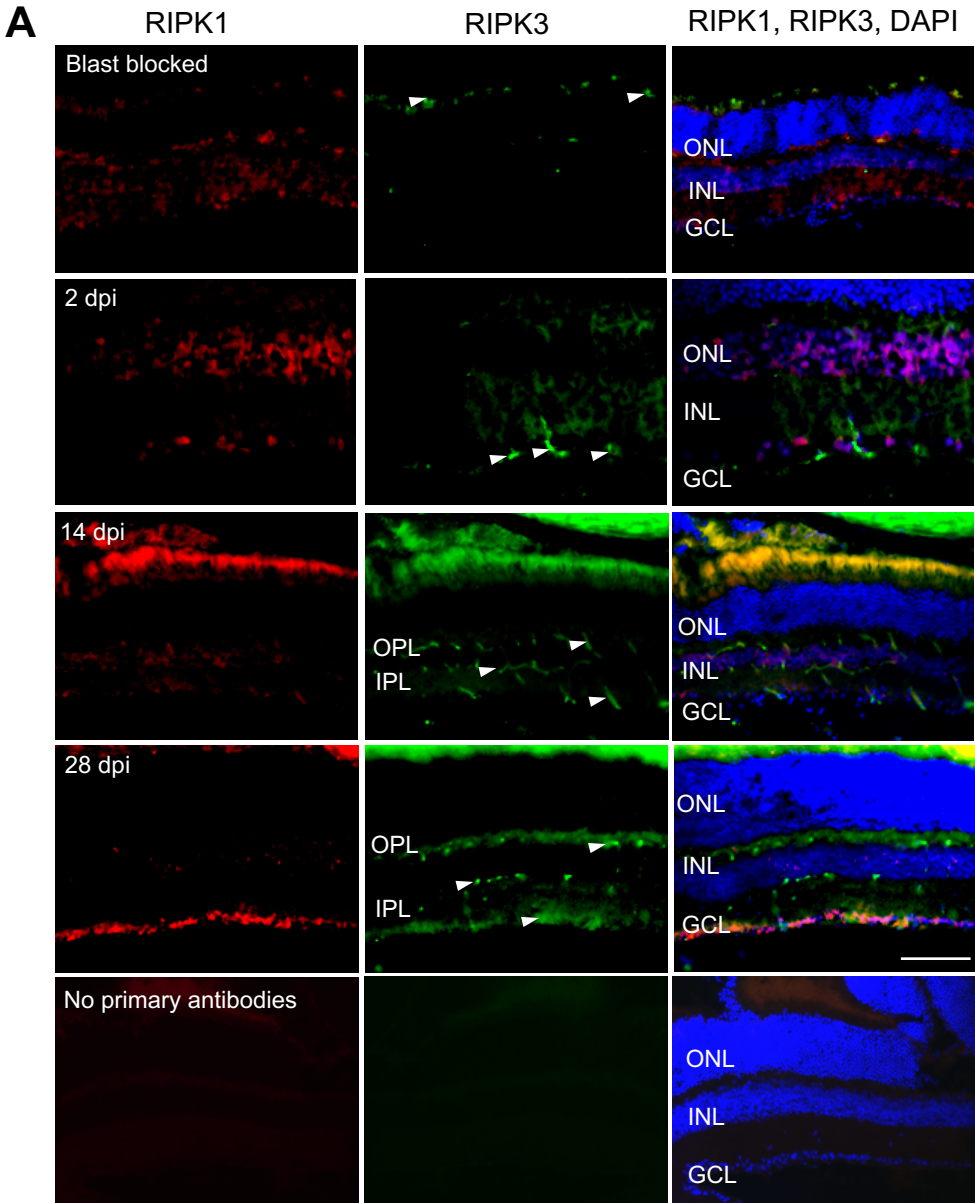

Supplement: NIHMS1699763-supplement-Supplemental_Figure_3.pdf [file NIHMS1699763-supplement-Supplemental_Figure_3.pdf]
